# Supplementary material for: Improved Access to Organo‐Soluble Di‐ and Tetrafluoridochlorate(I)/(III) Salts
Source: PubMed Central journal article supplement (PMC7540313; doi:10.1002/anie.202006268), 2020-07-15
Supplement: ANIE-59-16002-s001.pdf [file ANIE-59-16002-s001.pdf]

## Supporting Information

### **Improved Access to Organo-Soluble Di- and Tetrafluoridochlorate-(I)/(III) Salts**

*P. Pröhm, J. R. Schmid, K. Sonnenberg, P. Voßnacker, S. Steinhauer, C. J. Schattenberg, R. Müller, M. Kaupp, and S. Riedel\**

anie\_202006268\_sm\_miscellaneous\_information.pdf

## Supporting Information

### Table of Contents

|                          |    |
|--------------------------|----|
| Experimental Section     | 3  |
| Reactivity Studies       | 7  |
| Crystallographic Section | 15 |
| Computational Section    | 16 |
| References               | 17 |

### Caution!

Fluorine, even under dilute conditions, is extraordinarily reactive and can react violently with organic materials under the formation of HF. Similarly, tetrafluoridochlorate(III) and difluoridochlorate(I) are strongly oxidizing compounds, which can decompose violently under certain conditions when exposed to organic materials. Exposure to acidic compounds (e.g. water or boron trifluoride) greatly enhances the reactivity due to the *in-situ* formation of ClF<sub>3</sub>. Additionally, precipitation also greatly enhances the reactivity of tetrafluoridochlorate(III) and difluoridochlorate(I) compounds, leading to explosions at temperatures above -40 °C. Usage of PFA, FEP or PTFE may lower the risk of injury.

### General Information

All experiments were performed under rigorous exclusion of moisture and oxygen using standard Schlenk techniques. Solids were handled in a dry box under argon atmosphere (O<sub>2</sub> < 0.5 ppm, H<sub>2</sub>O < 0.5 ppm). HF addition experiments were performed in 3.8 mm PFA tubes with a stainless steel vacuum line. Acetonitrile and propionitrile were dried over Sicapent® prior to use. [NEt<sub>4</sub>]Cl and [NEt<sub>3</sub>Me]Cl were dried over night at 120 °C under dynamic vacuum. All other chemicals were used as purchased. ClF was synthesized according to literature.<sup>[1]</sup>

Raman spectra were recorded on a Bruker MultiRAM II equipped with a low-temperature Ge detector (1064 nm, 30-80 mW, resolution, 4 cm<sup>-1</sup>). NMR spectra were recorded on a JEOL 400 MHz ECS or ECZ spectrometer. All reported chemical shifts are referenced to the  $\delta$  values given in IUPAC recommendations of 2008 using the <sup>2</sup>H signal of the deuterated solvent as internal reference.<sup>[2]</sup> For external locking acetone-d<sub>6</sub> was flame sealed in a glass capillary and the lock oscillator frequency was adjusted to give  $\delta(^1\text{H}) = 7.26$  ppm for a CHCl<sub>3</sub> sample locked on the capillary. Crystal data were collected on a Bruker D8 Venture diffractometer with a Photon 100 CMOS area detector with MoK $\alpha$  radiation. Single crystal were picked at -80 °C under nitrogen atmosphere and mounted on a 0.15 mm Mitegen micromount using perfluoroether oil diluted with perfluorohexane. The structures were solved with the ShelXT<sup>[3]</sup> structure solution program using intrinsic phasing and refined with the ShelXL<sup>[4]</sup> refinement package using least squares minimizations by using OLEX2.<sup>[5]</sup> For visualization the Diamond V3.0 program was used.<sup>[6]</sup>

Structure optimizations and nonrelativistic shielding calculations for the [XF<sub>n</sub>]<sup>-</sup> (X = Cl, Br, I; n=2, 4, 6) anions and the CFC<sub>3</sub> reference standard were performed using a developers' version of the TURBOMOLE program, release 7.4.<sup>[7]</sup> Overall four sets of structures were optimized using def2-TZVPPD<sup>[8]</sup> basis sets (including an effective core potential, ECP, for iodine<sup>[9]</sup>) and TURBOMOLE standard grid setting 3. Two sets of structures were obtained at the BP86<sup>[9]</sup>-D3(BJ)<sup>[10]</sup> level, either in the gas phase or using the Conductor-like Screening Model (COSMO)<sup>[11]</sup> with  $r_{\text{solv}} = 2.76$  [Å] and  $\epsilon = 35.94$  (parameters for the solvent radius and finite permittivity of acetonitrile).

## SUPPORTING INFORMATION

The other two sets were obtained at the B3LYP<sup>[12]</sup>-D3(BJ)<sup>[10]</sup> level of theory, also without and with COSMO solvent model. D3(BJ) stands for D3 atom-pairwise dispersion corrections with Becke-Johnson damping.<sup>[10]</sup>

Subsequent nonrelativistic nuclear-shielding calculations at these structures used a recent improved DFT-GIAO<sup>[13]</sup> implementation in Turbomole,<sup>[14]</sup> extended to allow the use of local hybrid functionals.<sup>[15]</sup> We used two functionals, which had previously been demonstrated to provide accurate <sup>19</sup>F shieldings,<sup>[15,16]</sup> the global hybrid B3LYP,<sup>[12b,17]</sup> and the LH12ct-SsifPW92.<sup>[18]</sup> local hybrid functional with position-dependent exact-exchange admixture.<sup>[19]</sup> These computations used pcSseg-4 basis sets<sup>[20]</sup> for F, Cl, and Br and ANO-RCC-unc<sup>[21]</sup> basis sets for I. For each of the abovementioned sets of structures, shielding calculations with these two functionals were performed without or with COSMO. This allows the evaluation of the role of solvent effects acting either indirectly via the structure or directly. The nonrelativistic shielding/shift results are given in Tables S3, S4.

To evaluate the role of spin-orbit and scalar relativistic effects, we also carried out four-component relativistic computations (at the BP86-D3(BJ)(COSMO,CH<sub>3</sub>CN)/def2-TZVPPD optimized structures) using the matrix Dirac-Kohn-Sham (mDKS) method<sup>[22]</sup> implemented in the ReSpect program, version 5.1.0.<sup>[23]</sup> As neither local hybrids nor B3LYP are currently available for shielding computations in ReSpect, we used a modified B3LYP functional with 50% admixture of exact Hartree-Fock exchange (B3LYP50), which should give results that are close to B3LYP data. Uncontracted Dyall valence quadruple- $\zeta$  (Dyall-VQZ)<sup>[24]</sup> basis sets were used for all atoms. Relativistic shielding/shift results are shown in Table S5.

## Experimental Section

### Synthesis of [NEt<sub>3</sub>Me][ClF<sub>4</sub>] in solution (low concentration)

[NEt<sub>3</sub>Me]Cl (100 mg, 0.659 mmol, 1 eq.) was dissolved in dried acetonitrile or propionitrile or CHFCl<sub>2</sub> (1 ml) and cooled to -35 °C (MeCN) or -55 °C (EtCN, CHFCl<sub>2</sub>). Dilute F<sub>2</sub> (10 % in Ar) was bubbled through the solution (16 min, 20 ml·min<sup>-1</sup>, 2 eq). Pure Ar (20 ml·min<sup>-1</sup>) was bubbled through the solution for 15 min in order to remove residual amounts of reactive gases. A colorless solution was obtained.

<sup>1</sup>H NMR (400 MHz, EtCN, ext. acetone-d<sub>6</sub>, 20 °C)  $\delta$ [ppm]= 3.87 (q, <sup>3</sup>J(<sup>1</sup>H,<sup>1</sup>H)=7.30 Hz, 6H, CH<sub>2</sub>) 3.48 (s, 3H N-CH<sub>3</sub>), 1.85 (t, <sup>3</sup>J(<sup>1</sup>H,<sup>1</sup>H)=7.30 Hz, <sup>3</sup>J(<sup>14</sup>N,<sup>1</sup>H)=1.84 Hz, CH<sub>3</sub>). <sup>19</sup>F NMR (377 MHz, EtCN, ext. acetone-d<sub>6</sub>, 20 °C)  $\delta$ [ppm]= 67 (ClF<sub>4</sub><sup>-</sup>); FT-Raman (EtCN, -196 °C):  $\tilde{\nu}$  = [ClF<sub>4</sub><sup>-</sup>]: 500 (a<sub>1g</sub>), 407(b<sub>1g</sub>), 278 cm<sup>-1</sup> (b<sub>2g</sub>).

### Synthesis of [NEt<sub>3</sub>Me][ClF<sub>4</sub>] in solution (high concentration)

[NEt<sub>3</sub>Me][Cl<sub>3</sub>] was prepared by the addition of 1 eq. of Cl<sub>2</sub> to [NEt<sub>3</sub>Me]Cl. [NEt<sub>3</sub>Me][Cl<sub>3</sub>] (0.621 g, 2.79 mmol, 1 eq.) was diluted with acetonitrile (0.3 ml) and cooled to -30 °C. Dilute F<sub>2</sub> (10 % in Ar) was bubbled through the solution (68 min, 20 ml min<sup>-1</sup>, 2 eq). To remove residual amounts of reactive gases, Ar was bubbled through the solution for (15 min, 20 ml min<sup>-1</sup>). A colorless solution was obtained. Analytics was identical to samples with low concentration.

### Crystal growth of [NEt<sub>4</sub>][ClF<sub>4</sub>]

The synthetic procedure is similar to [NEt<sub>3</sub>Me][ClF<sub>4</sub>]. Single crystals were obtained by slowly cooling a propionitrile solution to -80 °C over 1 week in a freezer. An ethanol bath in a Dewar was used to reduce the cooling rate.

### Synthesis of [NEt<sub>4</sub>]<sub>3</sub>[ClF<sub>4</sub>][ClF<sub>2</sub>]<sub>2</sub> in solution

[NEt<sub>4</sub>]Cl (300 mg, 1.81 mmol, 1 eq.) was dissolved in acetonitrile (3 ml) and cooled to -30 °C. Dilute F<sub>2</sub> (10 % in Ar) was bubbled through the solution (20 min, 20 ml min<sup>-1</sup>, 1.2 eq). To remove residual amounts of reactive gases, Ar was bubbled through the solution for 15 min. A colorless solution was obtained.

<sup>1</sup>H NMR (400 MHz, MeCN, ext. acetone-d<sub>6</sub>, -40 °C)  $\delta$ [ppm]= 3.11 (q, <sup>3</sup>J(<sup>1</sup>H,<sup>1</sup>H)=7.18 Hz, 8H, CH<sub>2</sub>), 1.12 (t, <sup>3</sup>J(<sup>1</sup>H,<sup>1</sup>H)=7.18 Hz, <sup>3</sup>J(<sup>14</sup>N,<sup>1</sup>H)=1.84 Hz, 12H, CH<sub>3</sub>). <sup>19</sup>F NMR (377 MHz, MeCN, ext. acetone-d<sub>6</sub>, -40 °C)  $\delta$ [ppm]= 67 (s, [ClF<sub>4</sub>]<sup>-</sup>), -125 (s, [ClF<sub>2</sub>]<sup>-</sup>) FT-Raman (MeCN, -196 °C):  $\tilde{\nu}$  = [ClF<sub>4</sub>]<sup>-</sup>: 500 (a<sub>1g</sub>), 407(b<sub>1g</sub>), 278 (b<sub>2g</sub>), [ClF<sub>2</sub>]<sup>-</sup>: 455 cm<sup>-1</sup> (a<sub>1g</sub>).

### Crystal growth of [NEt<sub>3</sub>Me]<sub>3</sub>[ClF<sub>4</sub>][ClF<sub>2</sub>]<sub>2</sub>

The synthetic procedure is similar to [NEt<sub>4</sub>]<sub>3</sub>[ClF<sub>4</sub>][ClF<sub>2</sub>]<sub>2</sub>. Single crystals were obtained by slowly cooling a propionitrile solution to -35 °C over 2 days in a freezer. An ethanol bath in a Dewar was used to reduce the cooling rate.

## SUPPORTING INFORMATION

Synthesis of  $[\text{NEt}_3\text{Me}][\text{ClF}_2]$  in solution

$[\text{NEt}_3\text{Me}]\text{Cl}$  (50 mg, 0.330 mmol, 1 eq) was dissolved in propionitrile (0.5 ml) and cooled to  $-50\text{ }^\circ\text{C}$ . Dilute  $\text{ClF}_2$  (10 % in Ar) was bubbled through the solution (8.5 min,  $20\text{ ml min}^{-1}$ , 2 eq). To remove residual amounts of reactive gases, Ar was bubbled through the solution for 15 min. A colorless solution was obtained. The reaction mixture was allowed to warm to  $-10\text{ }^\circ\text{C}$  and subsequently slowly cooled to  $-80\text{ }^\circ\text{C}$  in an ethanol bath Dewar to reduce the cooling rate. Single crystals were obtained after 4 days.

Raman (crystal,  $-196\text{ }^\circ\text{C}$ ):  $\tilde{\nu} = [\text{ClF}_2]^-$ :  $457\text{ cm}^{-1}$  ( $a_{1g}$ ).

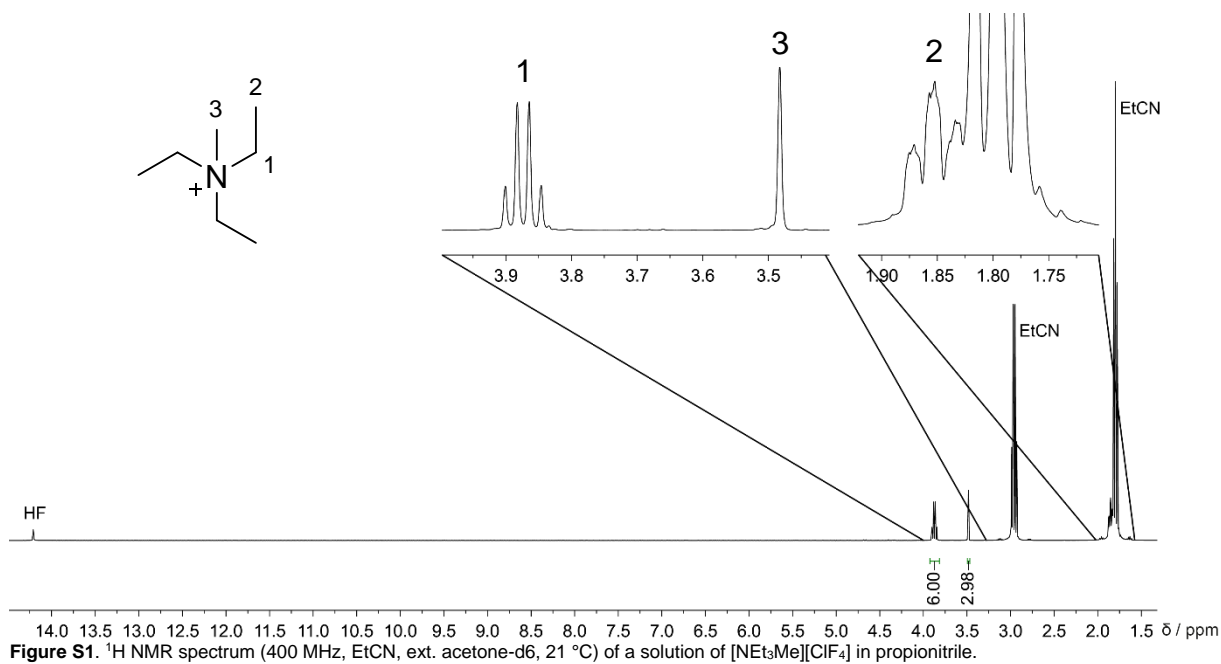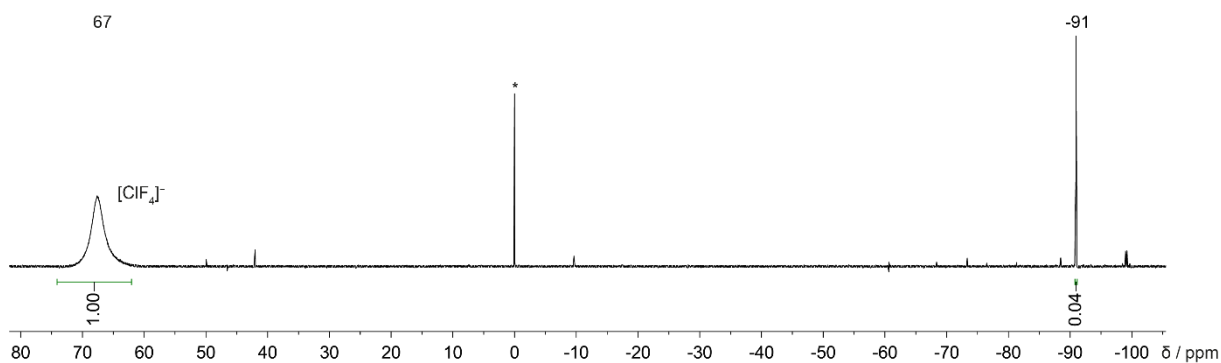

## SUPPORTING INFORMATION

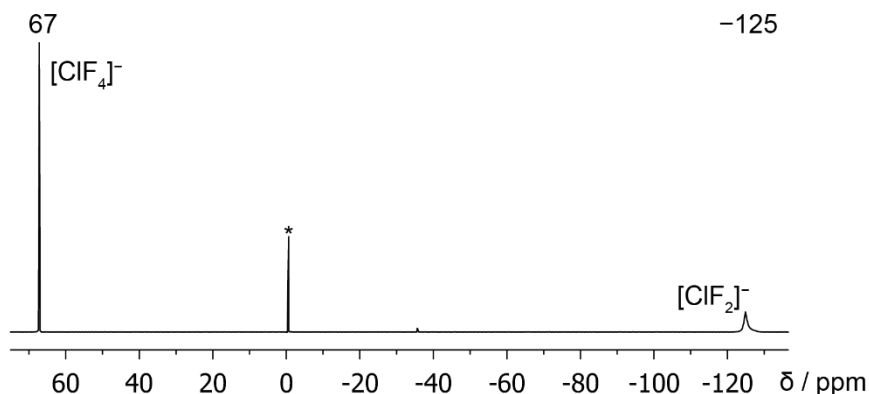

**Figure S3.**  $^{19}\text{F}$  NMR spectrum (377 MHz, MeCN, ext. acetone- $d_6$ ,  $-40\text{ }^\circ\text{C}$ ) of a solution of  $[\text{NEt}_3\text{Me}]_3[\text{ClF}_4][\text{ClF}_2]_2$  in acetonitrile. Asterisk (\*) denotes  $\text{CFCl}_3$ .

We realized that the  $^{19}\text{F}$  NMR signal of  $[\text{NEt}_3\text{Me}][\text{ClF}_4]$  shows different line broadening under certain conditions. Therefore, we studied the influence of temperature and HF impurities on the line width. Figure S4 shows the  $^{19}\text{F}$  NMR spectra at  $-20\text{ }^\circ\text{C}$  and  $-40\text{ }^\circ\text{C}$  prior and after addition of 1 eq of HF. Raising the temperature from  $-40\text{ }^\circ\text{C}$  to  $-20\text{ }^\circ\text{C}$  leads to a significant line broadening ( $-40\text{ }^\circ\text{C}$ : FWHM = 164.8 Hz,  $-20\text{ }^\circ\text{C}$  = 414.8 Hz). Addition of HF also leads to line broadening at  $-20\text{ }^\circ\text{C}$  and  $-40\text{ }^\circ\text{C}$  ( $-40\text{ }^\circ\text{C}$  + HF addition: FWHM = 251.6 Hz;  $-20\text{ }^\circ\text{C}$  + HF addition: FWHM = 637.7 Hz).

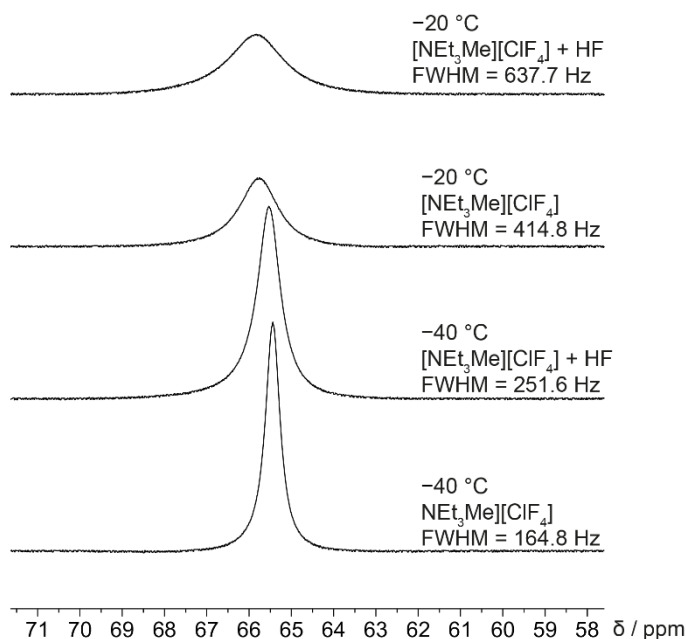

**Figure S4.**  $^{19}\text{F}$  NMR spectra (377 MHz, EtCN, ext. acetone- $d_6$ ) of a solution of  $[\text{NEt}_3\text{Me}][\text{ClF}_4]$  in propionitrile at  $-20\text{ }^\circ\text{C}$  and  $-40\text{ }^\circ\text{C}$  prior and after addition of 1 eq HF.

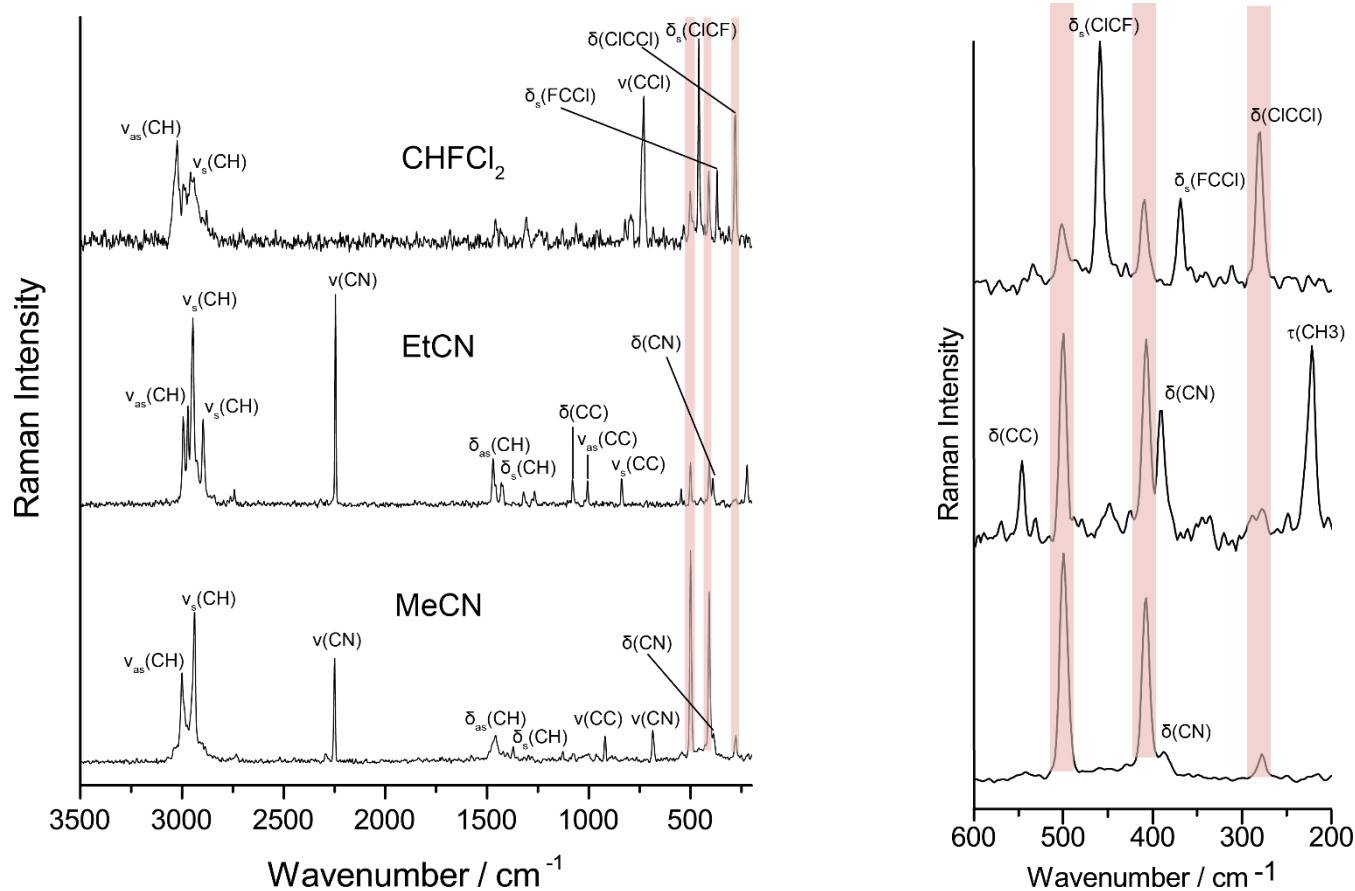

**Figure S5.** Raman spectra ( $-196\text{ }^{\circ}\text{C}$ ) of  $[\text{NEt}_3\text{Me}][\text{ClF}_4]$  in different solvents:  $\text{CHFC1}_2$  (top), EtCN (middle), MeCN (bottom). Left: full spectrum, right: Extract from  $200\text{--}600\text{ cm}^{-1}$ .  $[\text{ClF}_4]^-$  bands are highlighted in red.

$[\text{NEt}_3\text{Me}][\text{ClF}_4]$  in different solvents,  $\text{CHFC1}_2$  (top), propionitrile (middle) and acetonitrile (bottom). The three characteristic bands for  $[\text{ClF}_4]^-$  ( $500\text{ cm}^{-1}$  ( $a_{1g}$ ),  $407\text{ cm}^{-1}$  ( $b_{1g}$ ),  $278\text{ cm}^{-1}$  ( $b_{2g}$ )) are highlighted in red. The different intensities are due to different concentrations. In case of propionitrile the concentration is too low ( $0.32\text{ mol}\cdot\text{l}^{-1}$ ) to observe the  $b_{2g}$  vibration. In case of  $\text{CHFC1}_2$  the band of the  $b_{2g}$  vibration is superimposed by a solvent band.

## SUPPORTING INFORMATION

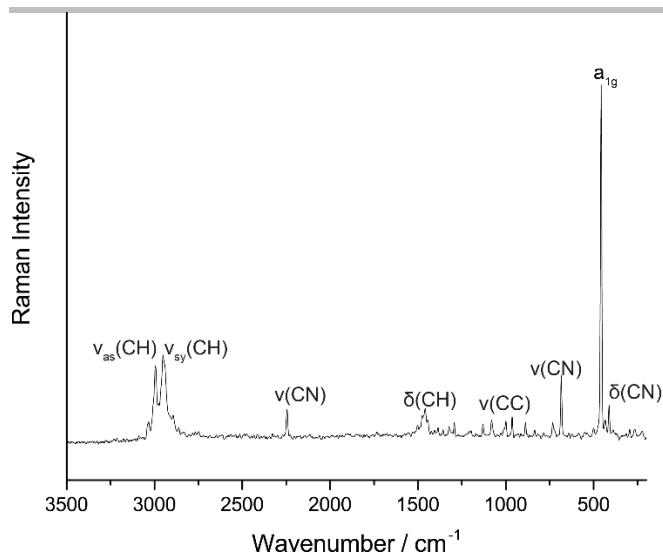

Figure S6. Raman spectrum ( $-196\text{ }^{\circ}\text{C}$ ) of  $[\text{NEt}_3\text{Me}][\text{ClF}_2]$ . Anion band  $a_{1g}$   $457\text{ cm}^{-1}$ .

## Reactivity Studies

### Disulfide activation

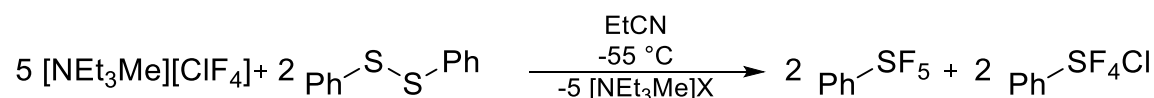

To a cooled ( $-55\text{ }^{\circ}\text{C}$ ) solution of  $[\text{NEt}_3\text{Me}][\text{ClF}_4]$  in propionitrile ( $1\text{ ml}$ ,  $0.659\text{ mol}\cdot\text{l}^{-1}$ ,  $1\text{ eq}$ ) a solution of phenyl disulphide ( $28.8\text{ mg}$ ,  $0.132\text{ mmol}$ ,  $0.2\text{ eq}$ ) in propionitrile ( $2\text{ ml}$ ) was added dropwise. The solution was stirred for  $15\text{ min}$  at  $-55\text{ }^{\circ}\text{C}$ , then allowed to warm to r.t. and stirred over night. A  $1 : 4 : 2$  mixture of  $\text{Ph-SF}_5 : \text{cis-PhSF}_4\text{Cl} : \text{trans-PhSF}_4\text{Cl}$  was obtained. After addition of  $\text{H}_2\text{O}$  ( $0.5\text{ ml}$ )  $\text{trans-PhSF}_4\text{Cl}$  was selectively hydrolysed to  $\text{PhSO}_2\text{F}$ . Addition of dilute potassium hydroxide solution ( $1\text{ ml}$ ) and heating to  $90\text{ }^{\circ}\text{C}$  over night led to the hydrolysis of  $\text{cis-PhSF}_4\text{Cl}$  and  $\text{PhSO}_2\text{F}$ . Products were identified by  $^{19}\text{F}$  NMR spectroscopy. NMR yield  $\text{PhSF}_5$ :  $17\%$

$^{19}\text{F}$  NMR ( $377\text{ MHz}$ , EtCN, ext. acetone- $d_6$ ,  $21\text{ }^{\circ}\text{C}$ )  $\delta = 85$  (quin,  $^2J(^{19}\text{F}, ^{19}\text{F}) = 148\text{ Hz}$ ,  $1\text{F}$ ,  $\text{PhSF}_5$  *trans*-F),  $63$  (d,  $4\text{F}$ ,  $\text{PhSF}_5$  *cis*-F),  $165$  (td,  $^2J(^{19}\text{F}, ^{19}\text{F}) = 164\text{ Hz}$ ,  $^2J(^{19}\text{F}, ^{19}\text{F}) = 149\text{ Hz}$ ,  $1\text{F}$ , *cis*- $\text{PhSF}_4$  *trans*-F),  $100$  (dd,  $^2J(^{19}\text{F}, ^{19}\text{F}) = 81\text{ Hz}$ ,  $2\text{F}$ , *cis*- $\text{PhSF}_4$  *cis*-F),  $67$  (dt,  $2\text{F}$ , *cis*- $\text{PhSF}_4$  *cis*-F),  $137$  (s,  $4\text{F}$ , *trans*- $\text{PhSF}_4\text{Cl}$ ),  $64$  ppm (s,  $1\text{F}$   $\text{PhSO}_2\text{F}$ ).

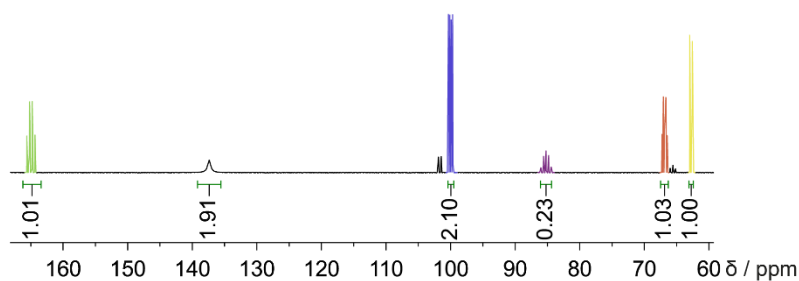

## SUPPORTING INFORMATION

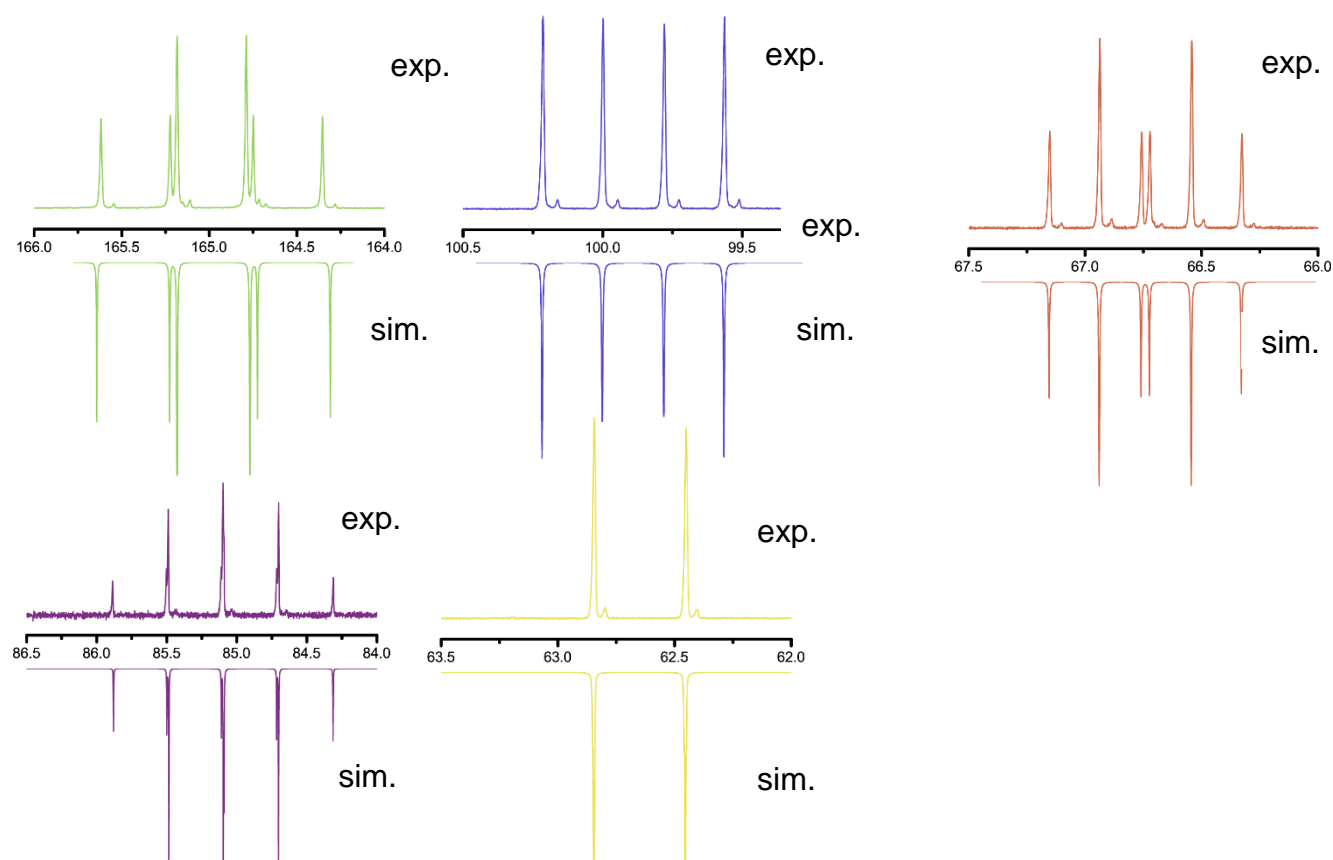

**Figure S7.**  $^{19}\text{F}$  NMR spectra (377 MHz, EtCN, ext. acetone- $d_6$ , 21 °C) of the reaction mixture after the reaction of  $[\text{NEt}_3\text{Me}][\text{ClF}_4]$  with  $\text{Ph}_2\text{S}_2$  showing three products:  $\text{PhSF}_5$ , *cis*- $\text{PhSF}_4\text{Cl}$  and *trans*- $\text{PhSF}_4\text{Cl}$ . Experimental spectra shown with positive intensities, simulated spectra shown with negative intensities.

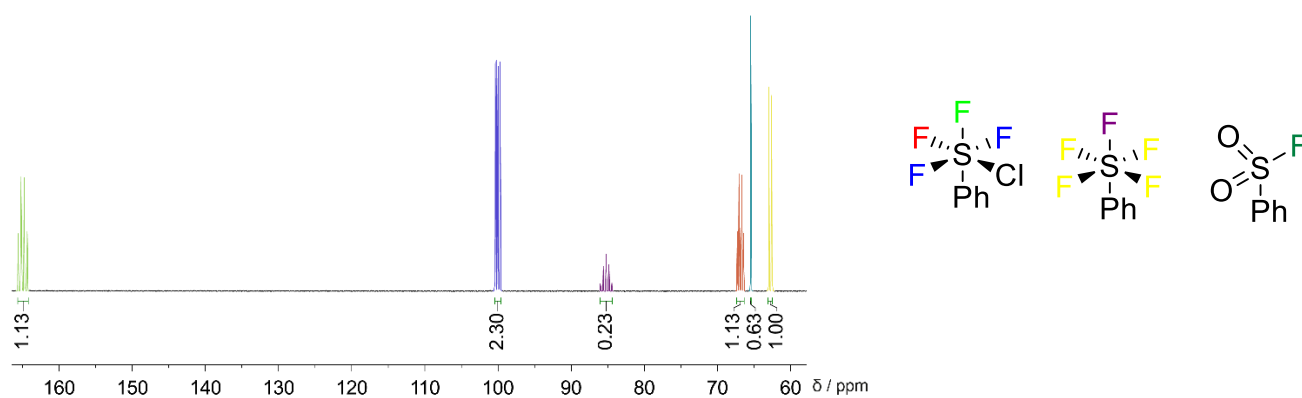

**Figure S8.**  $^{19}\text{F}$  NMR spectrum (377 MHz, EtCN, ext. acetone- $d_6$ , 21 °C) of the hydrolysed reaction mixture ( $\text{H}_2\text{O}$ , r.t., 15 min) after the reaction of  $[\text{NEt}_3\text{Me}][\text{ClF}_4]$  with  $\text{Ph}_2\text{S}_2$  showing three products:  $\text{PhSF}_5$ , *cis*- $\text{PhSF}_4\text{Cl}$  and  $\text{PhSO}_2\text{F}$ .



## SUPPORTING INFORMATION

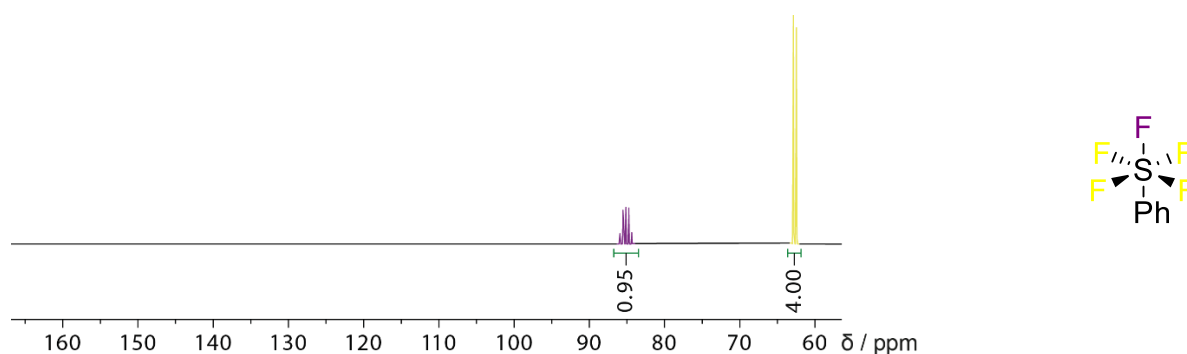

**Figure S9.**  $^{19}\text{F}$  NMR spectrum (377 MHz, EtCN, ext. acetone- $d_6$ , 21 °C) of the hydrolysed reaction mixture ( $\text{KOH}_{\text{aq}}$ , 90 °C, 8 h) after the reaction of  $[\text{NEt}_3\text{Me}][\text{ClF}_4]$  with  $\text{Ph}_2\text{S}_2$  showing only  $\text{PhSF}_5$ .

### Nitrile activation

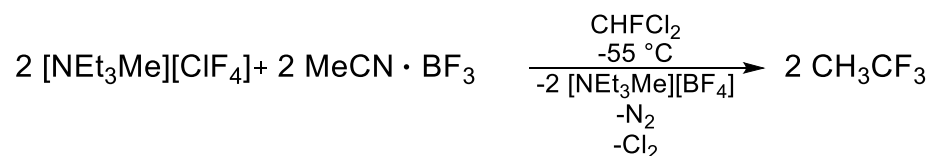

The acetonitrile boron trifluoride complex was synthesized by the addition of  $\text{BF}_3$  to acetonitrile at r.t. followed by removal of residual acetonitrile under reduced pressure.

To solid acetonitrile boron trifluoride complex (35.9 mg, 0.330 mmol, 0.5 eq) a solution of  $[\text{NEt}_3\text{Me}][\text{ClF}_4]$  (150 mg, 0.659 mmol, 1 eq) in dichlorofluoromethane (1 ml) was added at  $-60 \text{ } ^\circ\text{C}$ . The reaction mixture was analyzed by  $^{19}\text{F}$  NMR spectroscopy (Figure S9). The reaction equation suggests the equimolar formation of  $\text{CH}_3\text{CF}_3$  and  $[\text{BF}_4]^-$ . The  $^{19}\text{F}$  NMR spectrum shows a ratio of 1:230 in favour of  $[\text{BF}_4]^-$  this can be rationalised due to several reasons: First,  $\text{CH}_3\text{CF}_3$  has a boiling point of  $-50 \text{ } ^\circ\text{C}$ . During the reaction and the transfer of the reaction mixture probably significant amounts of the product evaporated. Secondly, during the reaction highly reactive  $\text{ClF}_3$  is formed leading to side products which are evident in the  $^{19}\text{F}$  NMR spectrum. The signal at  $-129 \text{ ppm}$  can be identified as  $[\text{SiF}_6]^{2-}$  from a reaction with the glass vessel.

## SUPPORTING INFORMATION

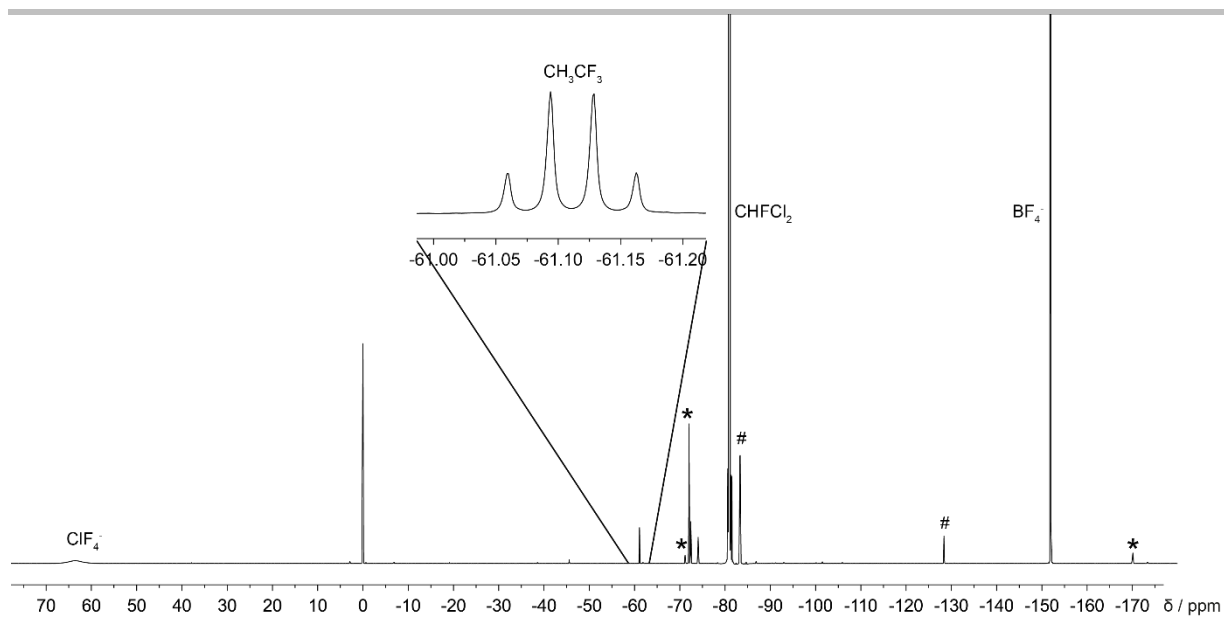

**Figure S10.**  $^{19}\text{F}$  NMR spectrum (377 MHz, EtCN, ext. acetone- $d_6$ , 21 °C) of the reaction mixture. Symbols denote solvent impurities (\*), side products generated during the reaction (#).

## CO activation

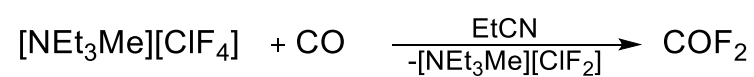

## SUPPORTING INFORMATION

A solution of  $[\text{NEt}_3\text{Me}][\text{ClF}_4]$  (150 mg, 0.659 mmol, 1 eq) was stirred under a CO atmosphere for 30 min at r.t. Then the gas-phase was analyzed via FT-IR spectroscopy. The FT-IR spectrum (Figure S7) only shows the presence of starting material (CO) solvent (EtCN) and product ( $\text{COF}_2$ ). The formation of  $\text{COCl}_2$  or  $\text{COCIF}$  was not observed.

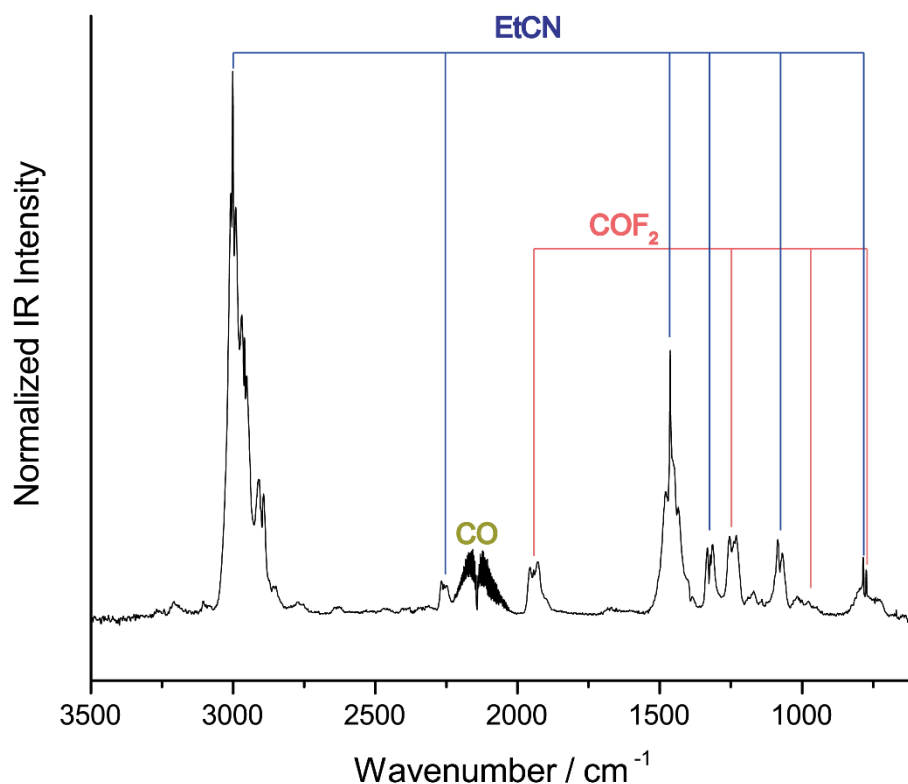

**Figure S11.** Gas-phase FT-IR spectrum (50 mbar, 10 cm) of the reaction mixture showing only solvent (EtCN, blue), starting material (CO, green) and product ( $\text{COF}_2$ , red).

### Dissolution of gold

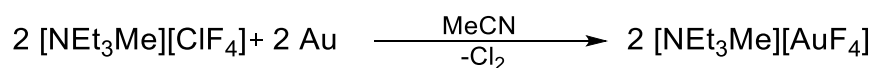

Gold metal (16 mg) was dissolved over 2 days in a solution of  $[\text{NEt}_3\text{Me}][\text{ClF}_4]$  in acetonitrile (0.5 ml,  $8 \text{ mol}\cdot\text{l}^{-1}$ ) at r.t. The solution was analyzed with  $^{19}\text{F}$  NMR spectroscopy. The major product is  $[\text{AuF}_4]^-$  (95 %) but traces of  $[\text{AuF}_3\text{Cl}]^-$  (3%) and *cis*- $[\text{AuF}_2\text{Cl}_2]^-$  (2 %) were also present in the reaction mixture.

## SUPPORTING INFORMATION

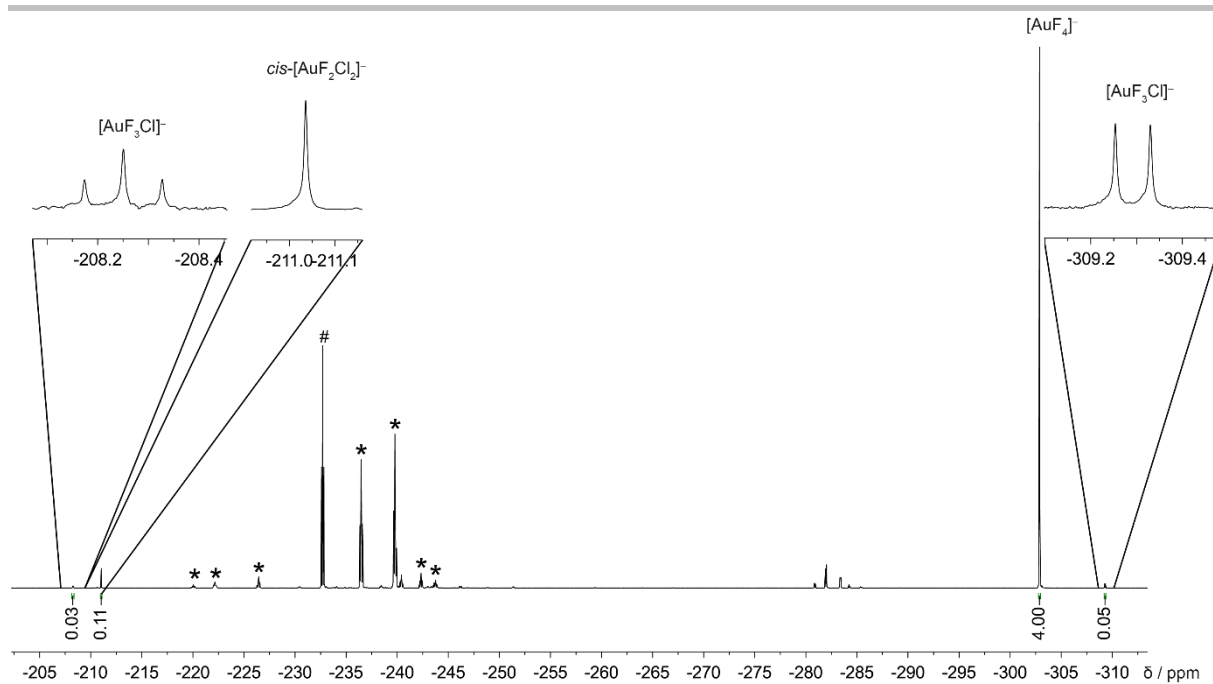

**Figure S12.**  $^{19}\text{F}$  NMR spectrum (377 MHz, MeCN, ext. acetone- $d_6$ , 21  $^{\circ}\text{C}$ ) of the reaction mixture after the reaction of  $[\text{NEt}_3\text{Me}][\text{ClF}_4]$  with Au. Symbols denote fluorinated impurities: # fluorinated solvent ( $\text{FCH}_2\text{CN}$ ), \* halogenated cations.

## SUPPORTING INFORMATION

## Tetracyanoborate activation

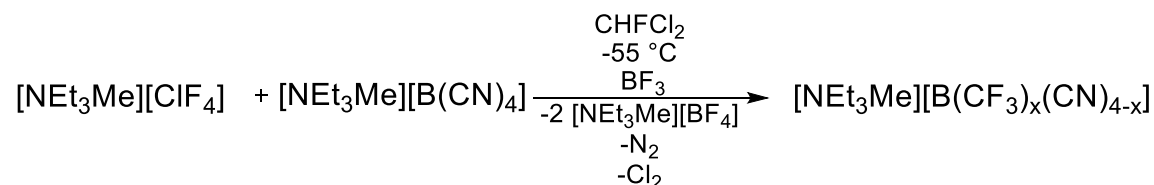

Potassiumtetracyanoborate (500 mg, 3.25 mmol, 1 eq) was dissolved in acetonitrile (10 ml). A solution of triethylmethylammonium chloride (0.493 mg, 3.25 mmol, 1 eq) in acetonitrile (5 ml) was added. The colourless precipitated was filtrated and the solvent was removed under reduced pressure to yield tetramethylammonium tetracyanoborate.

Triethylmethylammonium tetracyanoborate (76.0 mg, 0.330 mmol, 0.5 eq) was dissolved in CH<sub>2</sub>Cl<sub>2</sub> (1 ml) and boron trifluoride (67.0 mg, 0.989 mmol, 1.5 eq) was added. The solution was cooled to -60 °C. A cooled solution of Triethylmethylammonium tetrafluoridochlorate(III) (1 ml, 0.659 mol<sup>-1</sup>, 1 eq) was added at -60 °C, stirred for 5 min at -60 °C and let allowed to warm to r.t. Volatiles were removed and the residue was dissolved in CD<sub>3</sub>CN and analyzed via <sup>19</sup>F and <sup>11</sup>B NMR spectroscopy. [B(CF<sub>3</sub>)<sub>x</sub>(CN)<sub>4-x</sub>]<sup>-</sup> anions were identified according to literature.

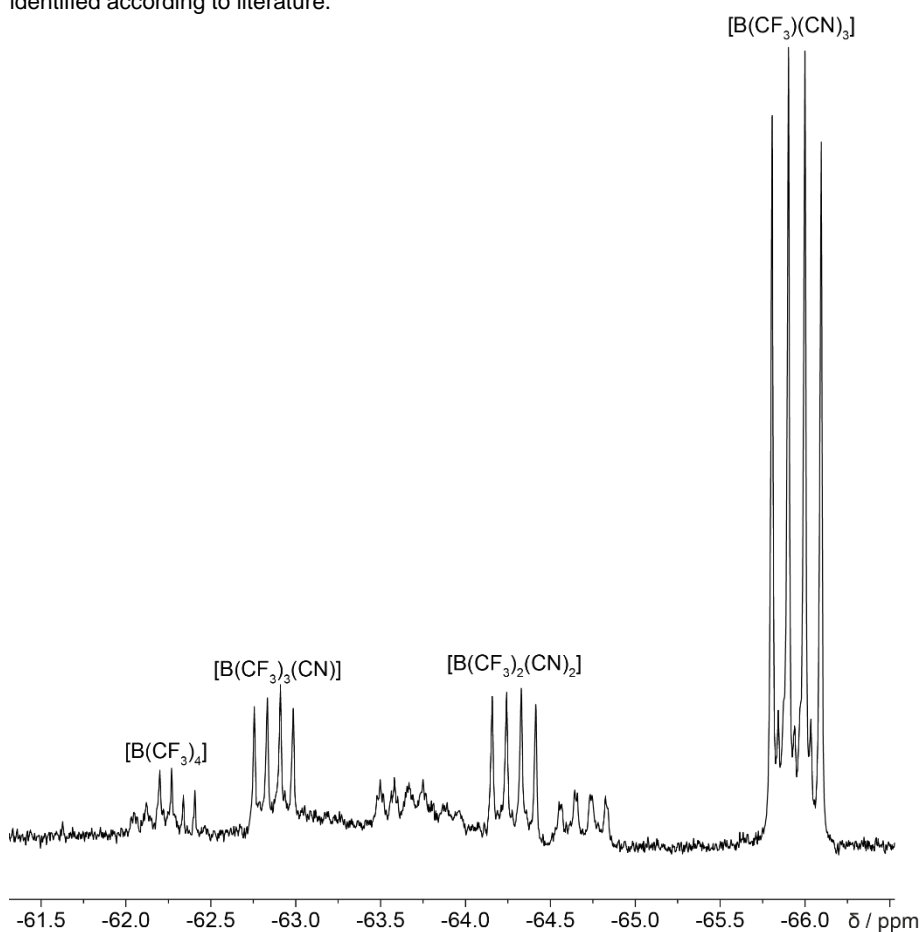

**Figure S13.** <sup>19</sup>F NMR spectrum (377 MHz, CD<sub>3</sub>CN, 21 °C) of the reaction mixture after the reaction of [NEt<sub>3</sub>Me][ClF<sub>4</sub>] with [NEt<sub>3</sub>Me][B(CN)<sub>4</sub>].

## SUPPORTING INFORMATION

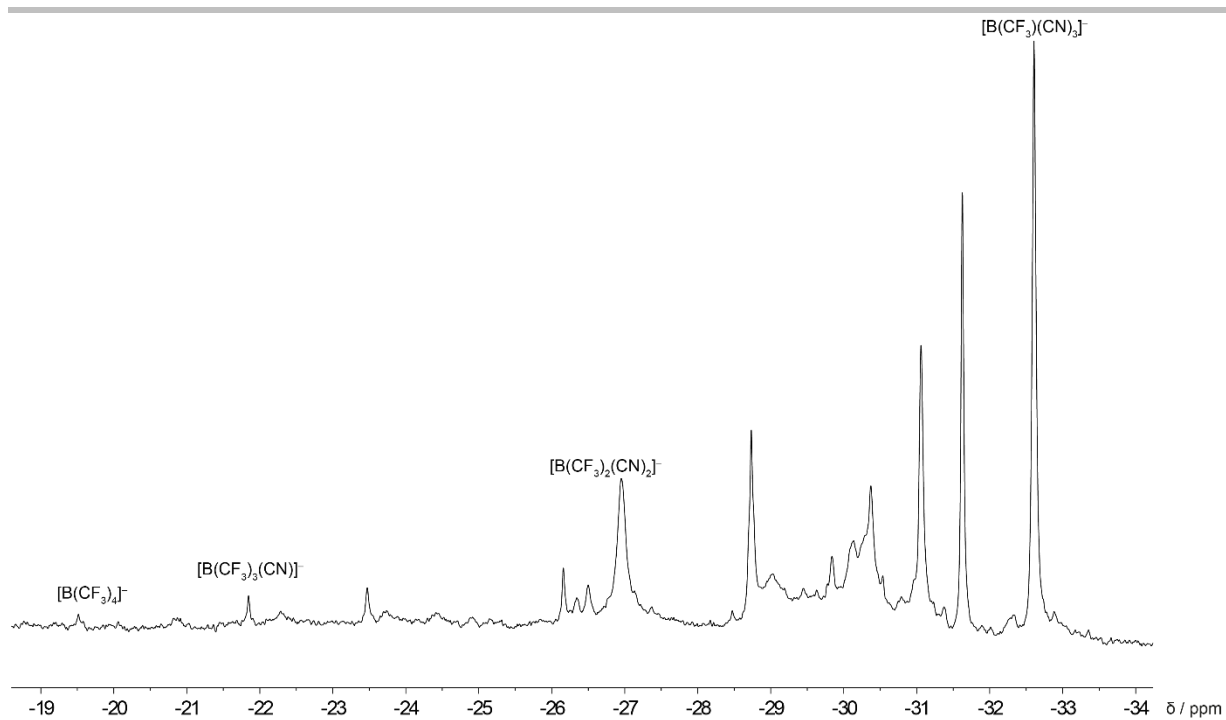

**Figure S14.**  $^{11}\text{B}\{^{19}\text{F}\}$  NMR spectrum (129 MHz,  $\text{CD}_3\text{CN}$ , 21 °C) of the reaction mixture after the reaction of  $[\text{NEt}_3\text{Me}][\text{ClF}_4]$  with  $[\text{NEt}_3\text{Me}][\text{B}(\text{CN})_4]$ .

## SUPPORTING INFORMATION

## Difluoridoaurate activation

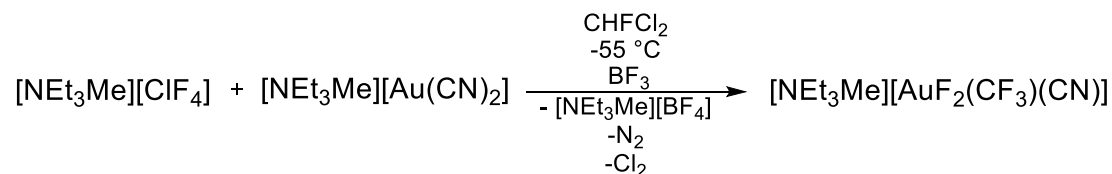

Cation metathesis was achieved in a similar procedure to triethylmethylammonium tetracyanoaurate.

Triethylmethylammonium dicyanoaurate (43 mg, 0.118 mmol, 0.18 eq) was dissolved in CHFCI<sub>2</sub> (1 ml). Boron trifluoride (19 mg, 0.280 mmol, 0.42 eq) was added. The solution was cooled to -60 °C. A cooled solution of triethylmethylammonium tetrafluoridochlorate(III) (1 ml, 0.659 mol<sup>-1</sup>, 1 eq) was added at -60 °C, stirred for 5 min at -60 °C and let allowed to warm to r.t and analyzed via <sup>19</sup>F NMR spectroscopy.

*Cis*-cyanodifluorido(trifluoromethyl)aurate(III) was identified using <sup>19</sup>F NMR spectroscopy in comparison with literature values.<sup>[25]</sup> Due to the low concentration of *cis*-cyanodifluorido(trifluoromethyl)aurate(III) the region between -80 and -170 ppm in the NMR spectrum is not shown. It contains solvent signal CHFCI<sub>2</sub> at -81 ppm, [SiF<sub>6</sub>]<sup>2-</sup> at -129 ppm and [BF<sub>4</sub>]<sup>-</sup> at -152 ppm  
 $\delta[\text{ppm}] = -58.29$  (dd, <sup>3</sup>J(<sup>19</sup>F, <sup>19</sup>F) = 5.8 Hz, <sup>3</sup>J(<sup>19</sup>F, <sup>19</sup>F) = 2.5 Hz, 3F),  $-196.66$  (dq, <sup>2</sup>J(<sup>19</sup>F, <sup>19</sup>F) = 65.3 Hz, <sup>3</sup>J(<sup>19</sup>F, <sup>19</sup>F) = 2.5 Hz, 1F),  $-254.31$  (dq, <sup>2</sup>J(<sup>19</sup>F, <sup>19</sup>F) = 65.3 Hz, <sup>3</sup>J(<sup>19</sup>F, <sup>19</sup>F) = 5.8, 1F)

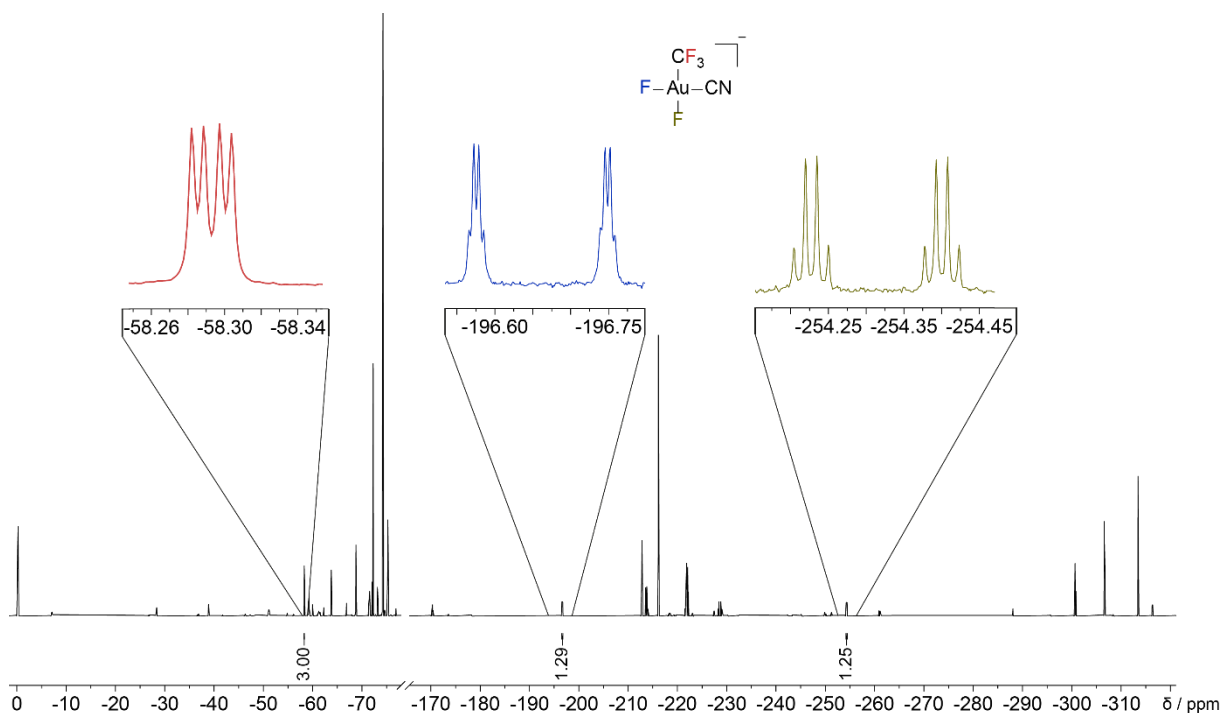

**Figure S15.** <sup>19</sup>F NMR spectrum (377 MHz, CHFCI<sub>2</sub>, ext. acetone-d<sub>6</sub>, 21 °C) of the reaction mixture after the reaction of [NEt<sub>3</sub>Me][ClF<sub>4</sub>] with [NEt<sub>3</sub>Me][Au(CN)<sub>2</sub>]. Omitted spectral area between -80 and -170 ppm contains solvent CHFCI<sub>2</sub> (-81 ppm), [SiF<sub>6</sub>]<sup>2-</sup> (-129 ppm) and [BF<sub>4</sub>]<sup>-</sup> (-152 ppm).

## SUPPORTING INFORMATION

## Crystallographic section

Table S1. Crystallographic details of  $[\text{NEt}_3\text{Me}]_3[\text{ClF}_4][\text{ClF}_2]$  and  $[\text{NEt}_4][\text{ClF}_4]$ .

| Compound                                       | $[\text{NEt}_3\text{Me}]_3[\text{ClF}_4][\text{ClF}_2]$       | $[\text{NEt}_4][\text{ClF}_4]$                                | $[\text{NetsMe}][\text{ClF}_2]$                               |
|------------------------------------------------|---------------------------------------------------------------|---------------------------------------------------------------|---------------------------------------------------------------|
| Empirical formula                              | $\text{C}_{21}\text{H}_{54}\text{Cl}_3\text{F}_8\text{N}_3$   | $\text{C}_8\text{H}_{20}\text{ClF}_4\text{N}$                 | $\text{C}_7\text{H}_{18}\text{ClF}_2\text{N}$                 |
| Formula weight                                 | 607.02                                                        | 241.70                                                        | 189.67                                                        |
| Temperature/K                                  | 100.0                                                         | 99.92                                                         | 100.0                                                         |
| Crystal system                                 | triclinic                                                     | monoclinic                                                    | monoclinic                                                    |
| Space group                                    | $P\bar{1}$                                                    | $C2/c$                                                        | $P2_1/c$                                                      |
| $a/\text{\AA}$                                 | 6.9802(8)                                                     | 11.4818(9)                                                    | 11.2608(4)                                                    |
| $b/\text{\AA}$                                 | 14.6749(16)                                                   | 7.5474(5)                                                     | 6.9954(2)                                                     |
| $c/\text{\AA}$                                 | 15.3580(16)                                                   | 14.3613(11)                                                   | 12.6412(4)                                                    |
| $\alpha/^\circ$                                | 97.190(4)                                                     | 90                                                            | 90                                                            |
| $\beta/^\circ$                                 | 92.017(4)                                                     | 110.877(3)                                                    | 102.6650(10)                                                  |
| $\gamma/^\circ$                                | 102.608(4)                                                    | 90                                                            | 90                                                            |
| Volume/ $\text{\AA}^3$                         | 1520.0(3)                                                     | 1162.81(15)                                                   | 971.57(5)                                                     |
| Z                                              | 2                                                             | 4                                                             | 4                                                             |
| $\rho_{\text{calc}}/\text{g cm}^{-3}$          | 1.326                                                         | 1.381                                                         | 1.297                                                         |
| $\mu/\text{mm}^{-1}$                           | 0.366                                                         | 0.347                                                         | 0.367                                                         |
| $F(000)$                                       | 648.0                                                         | 512.0                                                         | 408.0                                                         |
| Crystal size/ $\text{mm}^3$                    | 0.34 x 0.23 x 0.18                                            | 0.32 x 0.16 x 0.04                                            | 0.293 x 0.216 x 0.154                                         |
| Radiation                                      | $\text{MoK}\alpha$ ( $\lambda = 0.71073$ )                    | $\text{MoK}\alpha$ ( $\lambda = 0.71073$ )                    | $\text{MoK}\alpha$ ( $\lambda = 0.71073$ )                    |
| 2 $\theta$ range for data collection/ $^\circ$ | 5.358 to 57.15                                                | 6.072 to 56.738                                               | 3.708 to 61.112                                               |
| Index ranges                                   | $-9 \leq h \leq 9, -19 \leq k \leq 19, -20 \leq l \leq 20$    | $-15 \leq h \leq 15, -9 \leq k \leq 10, -19 \leq l \leq 19$   | $16 \leq h \leq 16, -9 \leq k \leq 10, -18 \leq l \leq 18$    |
| Reflections collected                          | 85154                                                         | 25147                                                         | 24557                                                         |
| Independent reflections                        | 7678 [ $R_{\text{int}} = 0.0626, R_{\text{sigma}} = 0.0322$ ] | 1453 [ $R_{\text{int}} = 0.0452, R_{\text{sigma}} = 0.0173$ ] | 2961 [ $R_{\text{int}} = 0.0275, R_{\text{sigma}} = 0.0157$ ] |
| Data/restraints/parameters                     | 7678/0/331                                                    | 1453/0/68                                                     | 2961/0/117                                                    |
| Goodness-of-fit on $F^2$                       | 1.059                                                         | 1.172                                                         | 1.065                                                         |
| Final R indexes [ $I \geq 2\sigma(I)$ ]        | $R_1 = 0.0372, wR_2 = 0.0810$                                 | $R_1 = 0.0300, wR_2 = 0.0752$                                 | $R_1 = 0.0268, wR_2 = 0.0751$                                 |
| Final R indexes [all data]                     | $R_1 = 0.0517, wR_2 = 0.0878$                                 | $R_1 = 0.0334, wR_2 = 0.0766$                                 | $R_1 = 0.0316, wR_2 = 0.0804$                                 |
| Largest diff. peak/hole / $e \text{\AA}^{-3}$  | 0.34/-0.44                                                    | 0.32/-0.38                                                    | 0.34/-0.34                                                    |
| CCDC deposition number                         | 1948997                                                       | 1948998                                                       | 2004243                                                       |

Table S2. Bond lengths and angles of  $[\text{ClF}_4]^-$  anions in  $[\text{NEt}_4][\text{ClF}_4]$  and  $[\text{NEt}_3\text{Me}]_3[\text{ClF}_4][\text{ClF}_2]$  in comparison with the literature known compounds  $[\text{pyr}][\text{ClF}_4]$ ,  $[\text{NO}][\text{ClF}_4]$ ,  $\text{Cs}[\text{ClF}_4]$ ,  $\text{Rb}[\text{ClF}_4]$  and  $\text{K}[\text{ClF}_4]$ .<sup>[26]</sup> Lengths in pm, angles in  $^\circ$ .

| Bond/Angle | $[\text{NEt}_4][\text{ClF}_4]$ | $[\text{NEt}_3\text{Me}]_3[\text{ClF}_4][\text{ClF}_2]$ | $[\text{pip}][\text{ClF}_4]$ | $[\text{NO}][\text{ClF}_4]$ | $\text{Cs}[\text{ClF}_4]$ | $\text{Rb}[\text{ClF}_4]$ | $\text{K}[\text{ClF}_4]$ |
|------------|--------------------------------|---------------------------------------------------------|------------------------------|-----------------------------|---------------------------|---------------------------|--------------------------|
| Cl1-F1     | 179.3(1)                       | 178.8(1)                                                | 175.9(2)                     | 187.4(1)                    | 179.4(4)                  | 180.34(9)                 | 179.82(6)                |
| Cl1-F2     | 180.6(1)                       | 179.4(1)                                                | 181.4(1)                     | 172.7(1)                    | 179.2(4)                  | 179.30(9)                 | -                        |
| Cl1-F3     | -                              | 180.0(1)                                                | 177.1(1)                     | -                           | -                         | -                         | -                        |
| Cl1-F4     | -                              | 180.8(1)                                                | 181.3(1)                     | -                           | -                         | -                         | -                        |
| F1-Cl1-F2  | 90.01(5)                       | 89.78(5)                                                | -                            | -                           | 89.1(2)                   | 89.33(4)                  | 89.79(4)                 |
| F2-Cl1-F1' | 89.99(5)                       | -                                                       | -                            | -                           | 90.9(2)                   | 90.67(4)                  | 90.21(4)                 |
| F2-Cl1-F3  | -                              | 89.66(5)                                                | -                            | -                           | -                         | -                         | -                        |
| F3-Cl1-F4  | -                              | 90.21(5)                                                | -                            | -                           | -                         | -                         | -                        |
| F4-Cl1-F1  | -                              | 90.35(5)                                                | -                            | -                           | -                         | -                         | -                        |

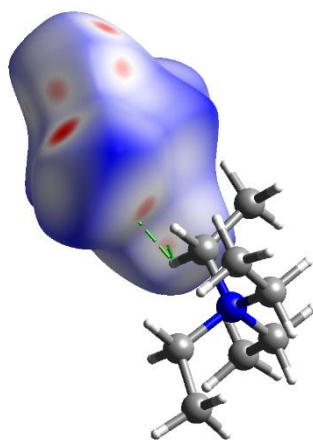Figure S16. Hirshfeld surface of of the  $[\text{ClF}_4]^-$  anion in  $[\text{NEt}_3\text{Me}][\text{ClF}_4]$ . Color code: blue = N, grey = C, white H, green dashed line displays hydrogen bond.<sup>[27]</sup>



## SUPPORTING INFORMATION

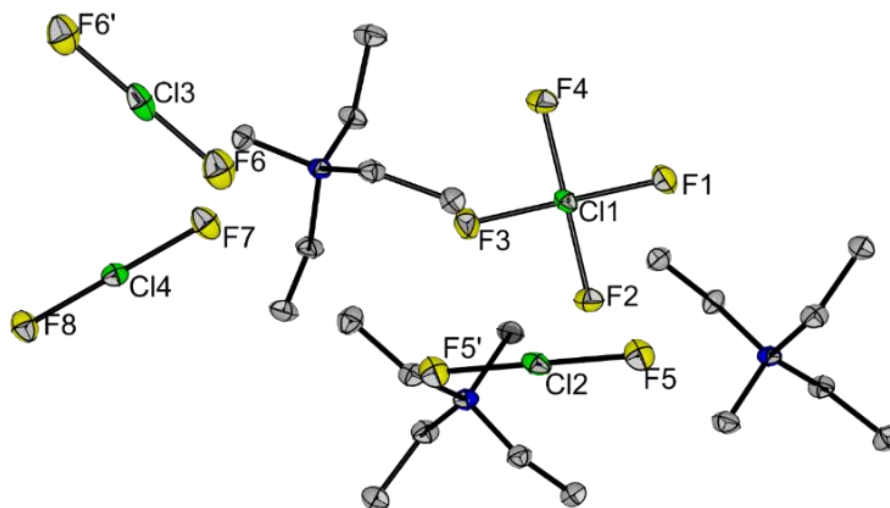

**Figure S17.** Crystal structure of  $[\text{NEt}_3\text{Me}]_3[\text{ClF}_4][\text{ClF}_2]_2$ . Color code: yellow = F, green = Cl, blue = N, grey = C. Displacement ellipsoids are shown at 50 % probability at 100 K. Selected bond lengths [pm] and bond angles [ $^\circ$ ]: F1–Cl1 178.8(1), F2–Cl1 179.4(1), F3–Cl1 180.0(1), F4–Cl1 180.8(2), F5–Cl2 185.4(1), F6–Cl3 184.1(2), F7–Cl4 184.9(1), F8–Cl4 185.4(1), F7–Cl4–F8 179.66(5). Hydrogen atoms omitted for clarity.

By slowly cooling a reaction mixture of  $[\text{NEt}_3\text{Me}]\text{Cl}$  with 1.2 eq. fluorine in acetonitrile, single crystals of  $[\text{NEt}_3\text{Me}]_3[\text{ClF}_4][\text{ClF}_2]_2$  were obtained (Figure S16). This compound crystallizes in the space group  $P\bar{1}$ . In the asymmetric unit are four anionic moieties. One is a  $[\text{ClF}_4]^-$  anion, the second is an asymmetric  $[\text{ClF}_2]^-$  ( $\text{F7Cl4F8}$ ) anion. Furthermore, there are two  $[\text{ClF}_2]^-$  units with the chlorine atom on centers of inversion ( $\text{F6Cl3F6}'$  and  $\text{F5Cl2F5}'$ ) (Figure 4). The bond lengths and angles in the  $[\text{ClF}_4]^-$  anion in  $[\text{NEt}_3\text{Me}]_3[\text{ClF}_4][\text{ClF}_2]_2$  are very similar to the ones found in  $[\text{NEt}_4][\text{ClF}_4]$ . The Cl–F bond lengths of the  $[\text{ClF}_2]^-$  anions vary between 184.1(2) pm and 185.4(1) pm. The bond angle of the  $[\text{ClF}_2]^-$  anion ( $\text{F7Cl4F7}$ ) is 179.66(5)  $^\circ$ .

## SUPPORTING INFORMATION

## Computational section

**Table S3.** Calculated  $^{19}\text{F}$  NMR chemical shifts relative to  $\text{CFCl}_3$  (in ppm) of  $[\text{XF}_n]^-$  ( $X = \text{Cl, Br, I; } n=2, 4, 6$ ) in comparison with experimental values, at BP86-D3 structures.<sup>a</sup>

| opt. NMR                | BHLYP    |           |            |             | LH12ct-SsifPW92 |           |            |             | $\delta_{\text{exp}}$ |
|-------------------------|----------|-----------|------------|-------------|-----------------|-----------|------------|-------------|-----------------------|
|                         | gas. gas | gas COSMO | COSMO. gas | COSMO COSMO | gas. gas        | gas COSMO | COSMO. gas | COSMO COSMO |                       |
| $[\text{ClF}_2]^-$      | -193.2   | -200.0    | -196.6     | -202.4      | -166.3          | -170.1    | -171.5     | -174.4      | -125                  |
| $[\text{ClF}_4]^-$      | 80.6     | 76.1      | 71.9       | 67.8        | 71.8            | 68.6      | 63.3       | 60.5        | 67                    |
| $[\text{ClF}_6]^-$      | 284.3    | 286.8     | 275.0      | 277.6       | 255.1           | 257.3     | 246.6      | 248.9       | —                     |
| $[\text{BrF}_2]^-$      | -284.4   | -294.6    | -286.2     | -295.5      | -262.6          | -270.7    | -265.4     | -272.7      | -210                  |
| $[\text{BrF}_4]^-$      | -32.2    | -38.3     | -36.3      | -42.0       | -36.6           | -41.6     | -40.7      | -45.4       | -37                   |
| $[\text{BrF}_6]^-$      | 131.9    | 135.0     | 126.0      | 129.2       | 114.6           | 117.4     | 109.0      | 111.9       | 94                    |
| $[\text{IF}_2]^-$       | -350.1   | -359.3    | -351.4     | -360.1      | -338.1          | -346.7    | -339.5     | -347.8      | -282                  |
| $[\text{IF}_4]^-$       | -103.1   | -109.5    | -105.1     | -111.1      | -109.8          | -115.5    | -111.8     | -117.3      | -106                  |
| $[\text{IF}_6]^-$       | 31.1     | 33.3      | 28.1       | 30.5        | 14.8            | 16.9      | 11.9       | 14.1        | 13                    |
| $\sigma(\text{CFCl}_3)$ | 185.4    | 189.7     | 183.8      | 183.8       | 195.2           | 198.8     | 193.7      | 197.5       |                       |

<sup>a</sup> At BP86-D3(BJ)/def2-TZVPPD optimized structures.  $\text{CFCl}_3$  reference shieldings at the same level have been used to obtain the relative shifts. Nonrelativistic results with pcSseg-4 basis sets for F, Cl, Br, and ANO-RCC-unc for I.

**Table S4.** Calculated  $^{19}\text{F}$  NMR chemical shifts relative to  $\text{CFCl}_3$  (in ppm) of  $[\text{XF}_n]^-$  ( $X = \text{Cl, Br, I; } n=2, 4, 6$ ) in comparison with experimental values, at B3LYP-D3 structures.<sup>a</sup>

| opt. NMR           | BHLYP    |           |            |             | LH12ct-SsifPW92 |           |            |             | $\delta_{\text{exp}}$ |
|--------------------|----------|-----------|------------|-------------|-----------------|-----------|------------|-------------|-----------------------|
|                    | gas. gas | gas COSMO | COSMO. gas | COSMO COSMO | gas. gas        | gas COSMO | COSMO. gas | COSMO COSMO |                       |
| $[\text{ClF}_2]^-$ | -190.6   | -196.4    | -193.4     | -198.4      | -169.8          | -171.0    | -173.3     | -169.8      | -125                  |
| $[\text{ClF}_4]^-$ | 65.3     | 61.3      | 58.5       | 54.9        | 56.5            | 53.8      | 49.9       | 47.5        | 67                    |
| $[\text{ClF}_6]^-$ | 250.8    | 252.9     | 243.0      | 245.3       | 224.7           | 226.7     | 217.5      | 219.7       | —                     |
| $[\text{BrF}_2]^-$ | -279.4   | -288.5    | -281.1     | -289.5      | -260.0          | -267.1    | -262.3     | -268.9      | -210                  |
| $[\text{BrF}_4]^-$ | -38.2    | -43.7     | -41.5      | -46.7       | -43.3           | -47.8     | -46.6      | -50.8       | -37                   |
| $[\text{BrF}_6]^-$ | 113.8    | 116.4     | 108.5      | 111.4       | 97.6            | 100.0     | 92.7       | 95.3        | 94                    |
| $[\text{IF}_2]^-$  | -343.0   | -351.5    | -344.6     | -352.9      | -332.4          | -340.3    | -333.9     | -341.8      | -282                  |
| $[\text{IF}_4]^-$  | -99.5    | -105.5    | -101.3     | -107.1      | -107.0          | -112.5    | -108.8     | -114.1      | -106                  |
| $[\text{IF}_6]^-$  | 29.3     | 31.1      | 26.5       | 28.4        | 12.7            | 14.4      | 9.9        | 11.7        | 13                    |
| $\text{CFCl}_3$    | 190.77   | 194.77    | 189.11     | 193.25      | 200.31          | 203.63    | 198.72     | 202.17      |                       |

<sup>a</sup> At B3LYP-D3(BJ)/def2-TZVPPD optimized structures.  $\text{CFCl}_3$  reference shieldings at the same level have been used to obtain the relative shifts. Nonrelativistic results with pcSseg-4 basis sets for F, Cl, Br, and ANO-RCC-unc for I.

**Table S5.** Fully relativistic 4c-mDKS/B3LYP50/Dyall-VQZ results for  $^{19}\text{F}$  NMR nuclear shieldings and chemical shifts of  $[\text{XF}_n]^-$  ( $X = \text{Cl, Br, I; } n=2, 4, 6$ ).<sup>a</sup>

|                       | $[\text{ClF}_2]^-$ | $[\text{ClF}_4]^-$ | $[\text{ClF}_6]^-$ | $[\text{BrF}_2]^-$ | $[\text{BrF}_4]^-$ | $[\text{BrF}_6]^-$ | $[\text{IF}_2]^-$ | $[\text{IF}_4]^-$ | $[\text{IF}_6]^-$ | $\text{CFCl}_3$ |
|-----------------------|--------------------|--------------------|--------------------|--------------------|--------------------|--------------------|-------------------|-------------------|-------------------|-----------------|
| $\sigma^{\text{iso}}$ | 389.0              | 126.2              | -78.8              | 471.3              | 236.1              | 75.0               | 539.6             | 321.5             | 192.1             | 192.4           |
| $\delta$              | -196.5             | 66.2               | 271.2              | -278.9             | -43.7              | 117.4              | -347.2            | -129.2            | 0.3               | 0               |
| $\delta_{\text{exp}}$ | -125               | 67                 | —                  | -210               | -37                | 94                 | -282              | -106              | 13                | 0               |

<sup>a</sup> Gas-phase results relative to  $\text{CFCl}_3$  at the same level, at BP86-D3(BJ)(COSMO,  $\text{CH}_3\text{CN}$ )/def2-TZVPPD structures.

## SUPPORTING INFORMATION

## References

- [1] M. Baudler, G. Brauer, *Handbuch der Präparativen Anorganischen Chemie in drei Bänden, Bd1*, Vol 5., Ferdinand Enke, Stuttgart, **1975**, p.166.
- [2] R. K. Harris, E. D. Becker, S. M. Cabral de Menezes, P. Granger, R. E. Hoffman, K. W. Zilm, *Pure Appl. Chem.* **2008**, *80*, 59.
- [3] G. M. Sheldrick, *Acta Crystallogr. A* **2008**, *A64*, 112.
- [4] G. M. Sheldrick, *Acta Crystallogr. C* **2015**, *C71*, 3.
- [5] O. V. Dolomanov, L. J. Bourhis, R. J. Gildea, J. A. K. Howard, H. Puschmann, *J. Appl. Cryst.* **2009**, *42*, 339.
- [6] K. Brandenburg, *Crystal Impact GbR* **2009**.
- [7] Local version derived from Turbomole version 7.4, Turbomole GmbH, 2017. Turbomole is a development of University of Karlsruhe and Forschungszentrum Karlsruhe 1989–2007, Turbomole GmbH since 2007.
- [8] a) A. D. Becke *Phys. Rev. A* **1998**, *38*, 3098; b) J. P. Perdew *Phys. Rev. B* **1986**, *33*, 8822.
- [9] a) F. Weigend, R. Ahlrichs, *Phys. Chem. Chem. Phys.* **2005**, *7*, 3297; b) D. Rappoport, F. Furche, *J. Chem. Phys.* **2010**, *133*, 134105; c) K. A. Peterson, D. Figgen, E. Goll, H. Stoll, M. Dolg, *J. Chem. Phys.* **2003**, *119*, 11113.
- [10] a) S. Grimme, J. Antony, S. Ehrlich, H. Krieg, *J. Chem. Phys.* **2010**, *132*, 154104; b) S. Grimme, S. Ehrlich, L. Goerigk, L. J. *Comput. Chem.* **2011**, *32*, 1456–1465.
- [11] A. Klamt, G. Schüürmann, *J. Chem. Soc. Perkin Trans.* **1993**, *2*, 799.
- [12] a) A. D. Becke, *J. Chem. Phys.* **1993**, *98*, 5648; b) C. Lee, W. Yang, R. G. Parr, *Phys. Rev. B* **1988**, *37*, 785.
- [13] a) F. London, *J. Phys. Radium* **1937**, *8*, 397; b) R. Ditchfield, *Mol. Phys.* **1974**, *27*, 789; c) K. Wolinski, J. F. Hinton, P. Pulay, *J. Am. Chem. Soc.* **1990**, *112*, 8251.
- [14] K. Reiter, F. Mack, F. Weigend, *J. Chem. Theory Comput.* **2018**, *14*, 191.
- [15] C. J. Schattenberg, K. Reiter, F. Weigend, M. Kaupp *J. Chem. Theory Comput.* **2020**, *16*, 931.
- [16] T. Kupka, *Magn. Reson. Chem.* **2009**, *47*, 959.
- [17] A. D. Becke, *J. Chem. Phys.* **1993**, *98*, 1372.
- [18] A. V. Arbuznikov, M. Kaupp, *J. Chem. Phys.* **2012**, *136*, 014111.
- [19] T. M. Maier, A. V. Arbuznikov, M. Kaupp *WIREs Comp. Mol. Sci.* **2019**, *9*, e1378.
- [20] F. Jensen, *J. Chem. Theory Comput.* **2015**, *11*, 132.
- [21] B. O. Roos, R. Lindh, P.-Å. Malmqvist, V. Veryazov, P.-O. Widmark, *J. Phys. Chem. A* **2005**, *108*, 2851.
- [22] S. Komorovský, M. Repiský, O. L. Malkina, V. G. Malkin, I. Malkin Ondík, M. Kaupp *J. Chem. Phys.* **2008**, *128*, 104101/1-15.
- [23] M. Repisky, S. Komorovsky, V. G. Malkin, O. L. Malkina, M. Kaupp, K. Ruud, R. Bast, R. Di Remigio, U. Ekstrom, M. Kadek, S. Knecht, L. Konecny, E. Malkin, I. Malkin-Ondik, ReSpect 5.1.0 (2019) Relativistic Spectroscopy DFT program <http://www.respectprogram.org>.
- [24] K. G. Dyall, *Theor. Chem. Acc.* **2006**, *115*, 441.
- [25] E. Bernhardt, M. Finze, H. Willner, *J. Fluor. Chem.* **2004**, *125*, 967.
- [26] a) X. Zhang, K. Seppelt, *Z. Anorg. Allg. Chem.* **1997**, *623*, 491; b) B. Scheibe, S. I. Ivlev, A. J. Karttunen, F. Kraus, *Eur. J. Inorg. Chem.* **2020**, *37*, 477.
- [27] M. J. Turner, J. J. McKinnon, S. K. Wolff, D. J. Grimwood, P. R. Spackman, D. Jayatilaka and M. A. Spackman, *CrystalExplorer17*, University of Western Australia, **2017**.
